# Supplementary material for: Expression of mRNA Encoding Mcu and Other Mitochondrial Calcium Regulatory Genes Depends on Cell Type, Neuronal Subtype, and Ca2+ Signaling
Source: PubMed Central journal article supplement (PMC4734683; doi:10.1371/journal.pone.0148164), 2016-02-01
Supplement: pone.0148164.s003.pdf [file pone.0148164.s003.pdf]

Fig. S1

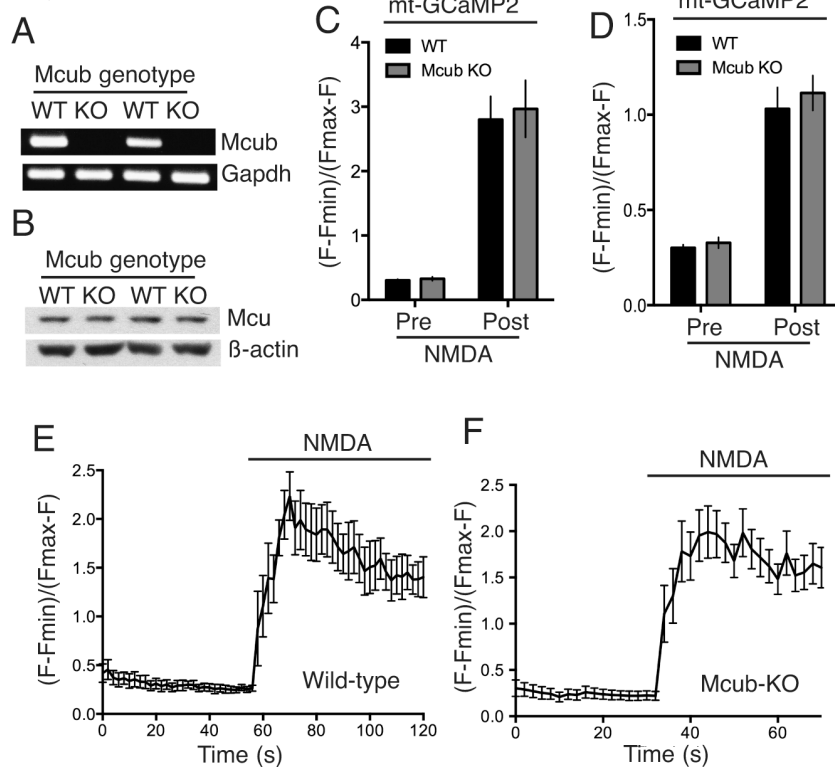

**Fig. S1.** **A)** qRT-PCR confirmation that Mcub-KO neurons do not express Mcub. **B)** Western blot to confirm that Mcub neurons do not have altered levels of Mcu. **C,D)** WT and Mcub-KO neurons (cultured from littermates) were transfected with mt-GCaMP2 and images taken before and after treatment with NMDA (20  $\mu$ M). Mitochondrial  $Ca^{2+}$  levels were calculated as a multiple of the Kd:  $(F-F_{min})/(F_{max}-F)$ . Maximum (C) and average (D)  $Ca^{2+}$  levels were calculated before and after NMDA application; n=10 imaging experiments were performed for each genotype, within which 71 WT cells and 77 KO cells were measured. **E, F)** Example traces from individual experiments whose data contributed to 5C and 5D. In the WT example (E), the mean  $\pm$  s.e.m. of 10 cells within that single experiment is shown. In the KO example (F), the mean  $\pm$  s.e.m. of 6 cells within that single experiment is shown.
